# Supplementary material for: Narrow red-emitting InP quantum dots with 38 nm FWHM: mechanistic insights into the role of In( i )Cl precursors
Source: Royal Society of Chemistry journal article supplement (doi:10.1039/d5tc03753k), 2026-01-01
Supplement: d5tc03753k1.pdf [file d5tc03753k1.pdf]

# Supporting Information

## Experimental section

### Chemicals

Indium(I) chloride ( $\text{In(I)Cl}$ , 99.99%, Aladdin), Indium(III) chloride ( $\text{InCl}_3$ , 99.9%, Aladdin), Tri-*n*-octylphosphine (TOP, 90%, Aladdin), Oleylamine (OLA, 80-90%, Aladdin), Tris(dimethylamino)phosphine ( $\text{P(DMA)}_3$ , 97%, Alfa Aesar), all chemicals were used directly without any further purification.

### Synthesis of InP QDs using $\text{In(I)Cl}$ :

Initially, 0.75 g (0.5 mmol) of  $\text{In(I)Cl}$ , 0.32 mL (0.3 mmol) of TOP, and 7 mL of OLA were loaded into a 50 mL three-neck flask. The mixture was degassed under vacuum at 50 °C for 30 min to remove residual moisture and oxygen. Subsequently, the system was heated to 200 °C under an inert atmosphere, followed by a rapid injection of 0.18 mL (1 mmol) of  $\text{P(DMA)}_3$ . The reaction was maintained for 30 min, during which the solution gradually turned deep red-black, indicating the formation of InP QDs. The reaction was then quenched by cooling the flask to room temperature. The resulting crude product was purified using a sequential centrifugation process. First, the reaction mixture was centrifuged at 4000 rpm for 3 min to remove unreacted precursors and metallic indium byproducts. Next, 30 mL of acetone was added, and the mixture was centrifuged at 8000 rpm for 3 min to collect the InP QD precipitate. The purified QDs were redispersed in 1 mL of anhydrous toluene under a nitrogen atmosphere and transferred to a 50 mL three-neck flask containing a magnetic stir bar. For surface etching, a controlled amount of 2% hydrofluoric acid solution (prepared by dilution with acetone) was introduced into the system.

### Synthesis of InP QDs using $\text{InCl}_3$ :

To synthesize InP QDs using  $\text{InCl}_3$ ,  $\text{InCl}_3$  (0.11 g, 0.5 mmol), TOP (0.32 mL, 0.3 mmol), and OLA (7 mL) were introduced into a 50 mL three-neck flask. The mixture was subjected to vacuum degassing at 50 °C for 30 min to remove residual moisture and oxygen. The flask was then heated to 200 °C under an inert atmosphere. At this temperature,  $\text{P(DMA)}_3$  (0.18 mL, 1 mmol) was rapidly injected, and the reaction was

kept at 200 °C for 30 min before being cooled to room temperature to terminate the reaction. The cooled InP QDs were purified by centrifugation at 8000 rpm for 3 min. After discarding the supernatant, 1 mL of methanol was added to fully dissolve InP precipitate. Subsequently, an appropriate amount of 2% HF solution was introduced to perform HF etching.

#### **Synthesis of InP QDs Using In(I)Br:**

The same synthetic procedure was applied to prepare InP QDs using In(I)Br instead of In(I)Cl.

#### **Characterization:**

Ultraviolet-visible (UV-Vis) absorption spectra were measured using a Shimadzu UV-2600 UV-Vis spectrophotometer. The excitonic absorption peak position (for shoulder peaks) was determined by Gaussian fitting. Emission spectra were acquired using a Tianjin Gangdong F-320 fluorescence spectrophotometer equipped with a 150 W xenon lamp.

PLQY was measured using the steady-state and transient fluorescence spectrometer (FLS1000, Edinburgh Instruments, UK). For the measurement, the etched InP QDs (without further centrifugation) were dispersed in hexane within a quartz cuvette, with the absorbance at the excitation wavelength (365 nm) precisely adjusted to 0.1. PLQY was then determined using the integrating sphere system.

Time-resolved photoluminescence (TRPL) measurements were performed on a high-sensitivity HORIBA Fluorolog-3 spectrofluorometer (HORIBA Instruments Incorporated). The photoluminescence (PL) decay curves were fitted with a biexponential function:

$$Y(t)=A_1\exp(-t/\tau_1) + A_2\exp(-t/\tau_2)$$

where  $\tau_1$  and  $\tau_2$  represent the decay time constants, and  $A_1$  and  $A_2$  denote their respective amplitudes [ $\chi^2 = 0.99$ ]. The average lifetime ( $\tau_{avg}$ ) was calculated using the following equation:

$$\tau_{avg} = (A_1\tau_1^2 + A_2\tau_2^2) / (A_1\tau_1 + A_2\tau_2)$$

XRD measurements were performed using a high-power variable-temperature Rigaku X-ray diffractometer. The sample was prepared by drop-casting a hexane-

dissolved InP quantum dot solution onto a dry silicon substrate, followed by complete solvent evaporation prior to testing. XPS analysis was conducted on a Shimadzu KRATOS Axis Supra X-ray photoelectron spectrometer. The sample was prepared by drop-casting a hexane-dissolved InP quantum dot solution onto a dry silicon substrate, followed by complete solvent evaporation prior to testing.  $^{31}\text{P}$  NMR spectra were acquired using a Bruker BioSpin AG AVANCE NEO 400 MHz NMR spectrometer. The sample was prepared by mixing 300  $\mu\text{L}$  of the InP quantum dot solution, 5.2 mg (0.02 mmol) of triphenylphosphine (external reference,  $\delta = -5$  ppm), and 300  $\mu\text{L}$  of deuterated toluene in an NMR tube for measurement.

**Stability Test:** Purified InP QDs after HF etching was weighed and thoroughly mixed with lamp-bead glue. The mixture was slowly poured onto a horizontally placed PET film, allowed to flow naturally and spread into a uniform layer, and then rapidly cured under ultraviolet irradiation to obtain composite film materials. The fluorescence properties of the films were subsequently measured using the fluorescence spectrophotometer.

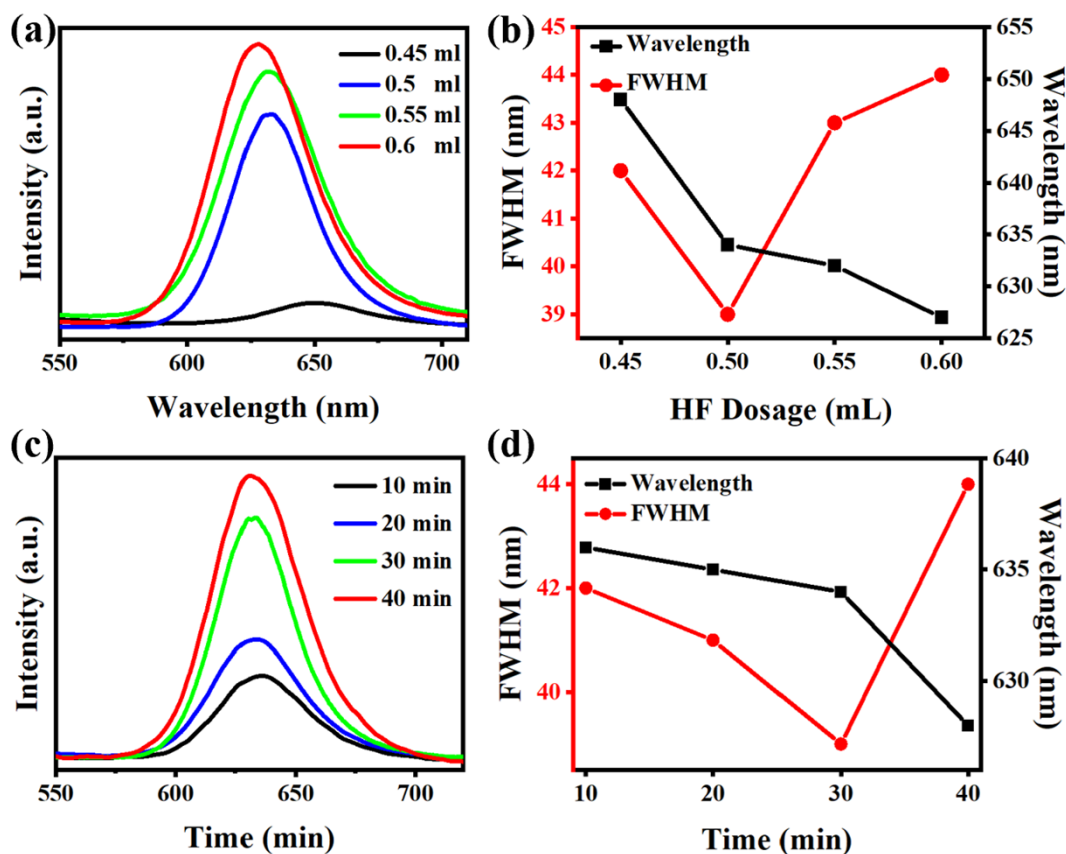

**Fig. S1** 2% HF concentration (a) PL spectra of InP quantum dots etched with different HF

dosages. (b) Variation of emission wavelength and FWHM with HF dosage. (c) PL spectra of InP quantum dots etched for different reaction times. (d) Variation of emission wavelength and FWHM with reaction time.

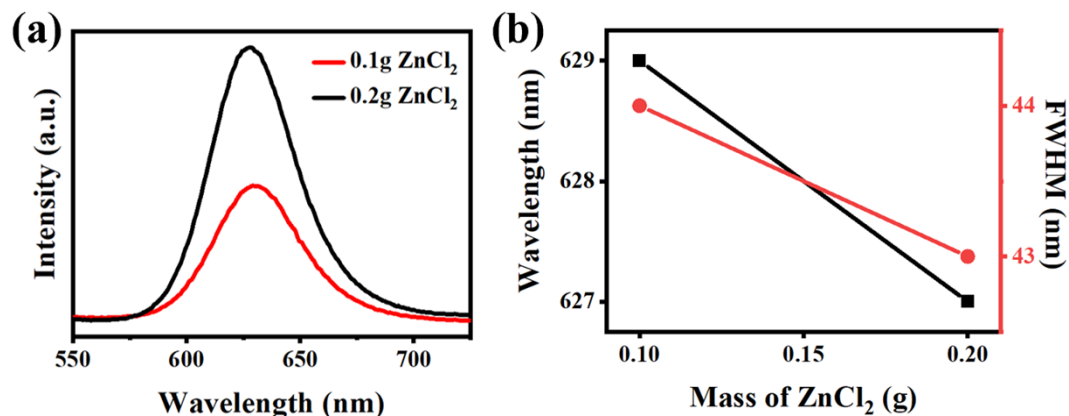

**Fig. S2** PL spectra of InP QDs prepared with different amounts of  $\text{ZnCl}_2$ . (b) Schematic diagram of wavelength and FWHM variation with different amounts of  $\text{ZnCl}_2$ .

**Table S1.** Comparative summary of red-emitting InP QDs synthesized via aminophosphine-based routes reported in recent literature.

| Precursors               | Year             | QDs        | PL (nm)    | FWHM (nm) | PLQY       | Ref                                                                |
|--------------------------|------------------|------------|------------|-----------|------------|--------------------------------------------------------------------|
| $\text{P}(\text{TMS})_3$ | 2019             | InP        | 630        | 35        | 100%       | Nature, 2019 575, 634-638                                          |
|                          | 2022             | InP        | 620        | 36        | 90%        | Nano Letters, 2022, 22 (10), 4067-4073                             |
|                          | 2023             | InP        | 614        | 37        | 90%        | Nano Letters, 2024, 24 (49), 15781-15787                           |
| $\text{P}(\text{DMA})_3$ | 2022             | InP        | 607        | 45        | 95%        | ACS Nano, 2022, 16, 9701-9712                                      |
|                          | 2022             | InP        | 621        | 44        | 86%        | Journal of Materials Chemistry C, 2022, 10(6): 2213-2222           |
|                          | 2022             | InP        | 617        | 45        | 85%        | ACS Energy Letters, 2022, 7(7): 2247-2255                          |
|                          | 2023             | InP        | 670        | 43        | 40%        | Journal of the American Chemical Society, 2023, 145(10): 5970-5981 |
|                          | 2023             | InP        | 632        | 43        | 74%        | ACS omega, 2023, 8(42): 39690-39698                                |
|                          | 2024             | InP        | 609        | 48        | 70%        | Inorg. Chem. 2024, 63, 6396-6407                                   |
|                          | 2025             | InP        | 615        | 44        | 96%        | Adv. Funct. Mater. 2025, e21226                                    |
|                          | <b>This work</b> | <b>InP</b> | <b>634</b> | <b>38</b> | <b>80%</b> |                                                                    |

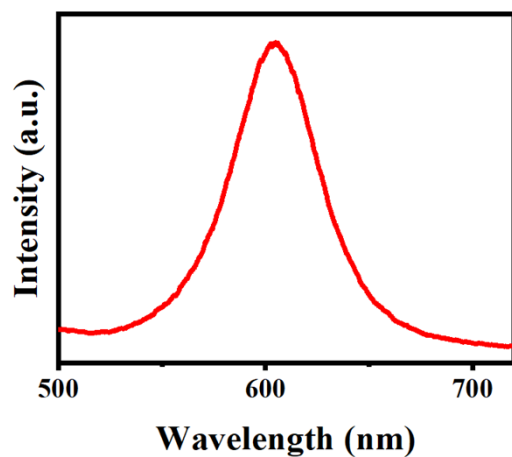

**Fig. S3** PL spectra of InP core QDs synthesized using In(I)Br.

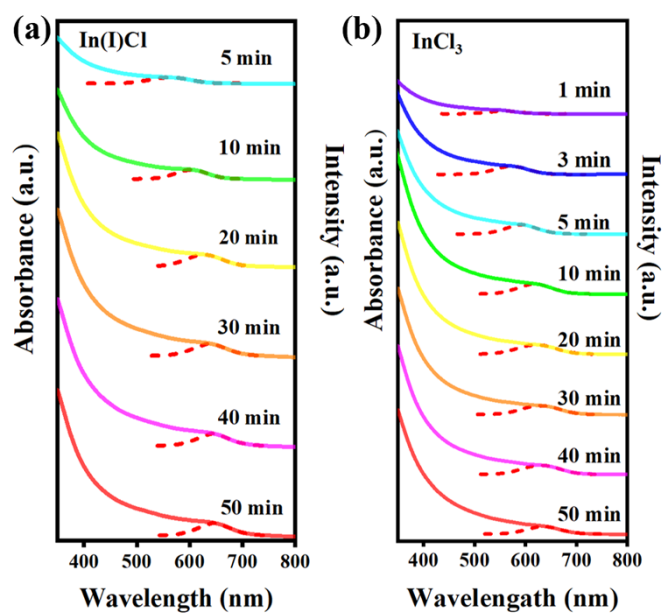

**Fig.S4** Evolution of absorption spectra and their Gaussian-fitted curves for InP QDs synthesized from  $\text{InCl}_3$  and  $\text{In(I)Cl}$  precursors.

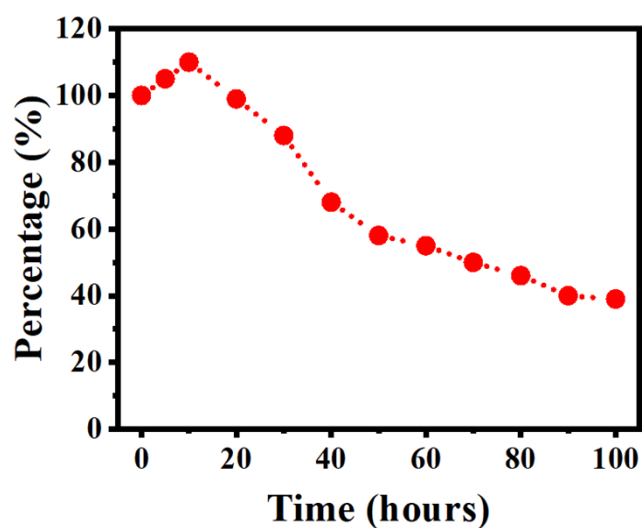

**Fig. S5** Stability testing spectra of InP QDs after HF etching.

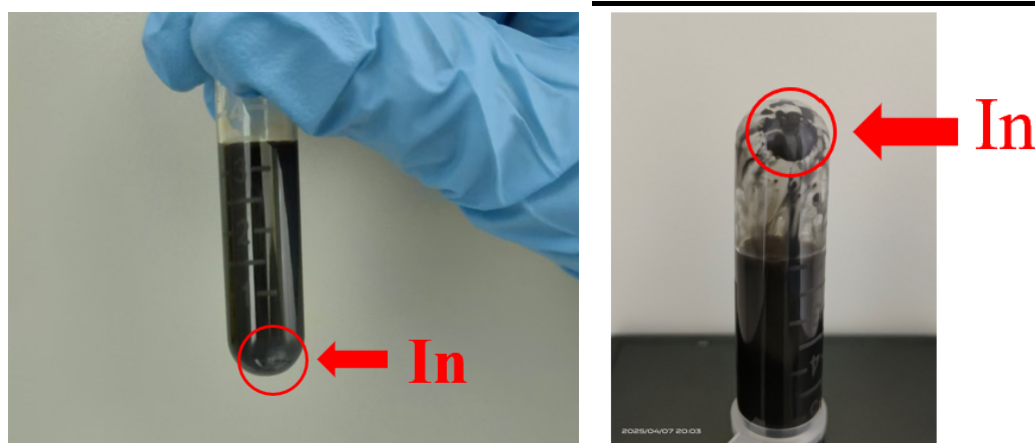

**Fig. S6** Schematic illustration of the precipitation behavior observed during centrifugation purification of InP QDs.

**Table S2.** Comparative analysis of PL lifetime characteristics for InP QDs before and after HF etching treatment.

| Sample                     | $\tau_{av}$ [ns] | $A_1$ [counts] | $\tau_1$ [ns] | $A_2$ [counts] | $\tau_2$ [ns] |
|----------------------------|------------------|----------------|---------------|----------------|---------------|
| InP QD solution            | 16.8             | 5837.8         | 4.6           | 1350.8         | 26.0          |
| HF-treated InP QD solution | 37.2             | 4956.8         | 13.8          | 2863.0         | 48.7          |

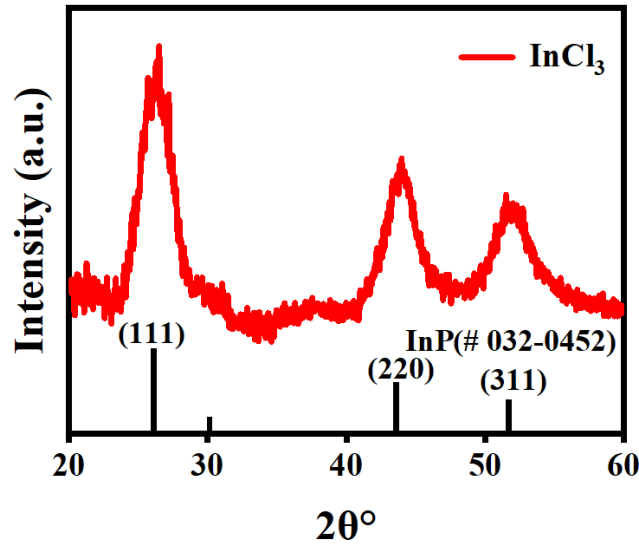

**Fig. S7** XRD pattern of InP QDs synthesized using InCl<sub>3</sub>.

The average crystallite size of InP QDs is analyzed based on XRD data, and the main calculation procedure is as follows:

K is the Scherrer constant, D is the average size of crystal, B is the FWHM of the measured diffraction peak,  $\theta$  is the diffraction angle, and  $\gamma$  is the X-ray wavelength.

For InP QDs synthesized using In(I)Cl

$$D = \frac{K\lambda}{B\cos\theta}$$

$$= (0.89 \times 0.15406) / (0.0517 \times \cos 0.2271)$$

$$= 2.72 \text{ nm}$$

For InP QDs synthesized using InCl<sub>3</sub>

$$D = \frac{K\lambda}{B\cos\theta}$$

$$= (0.89 \times 0.15406) / (0.0532 \times \cos 0.2289)$$

$$= 2.65 \text{ nm}$$
